# Supplementary material
Source: PubMed Central journal article supplement (PMC7255237)

**a**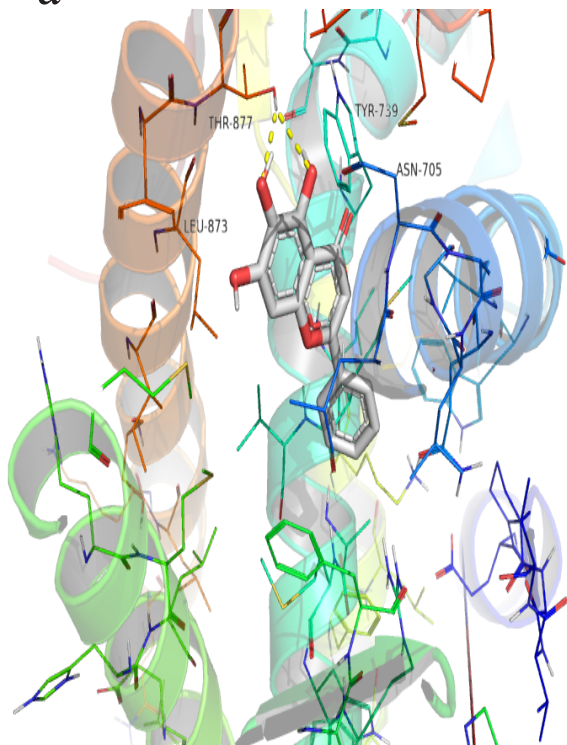**b**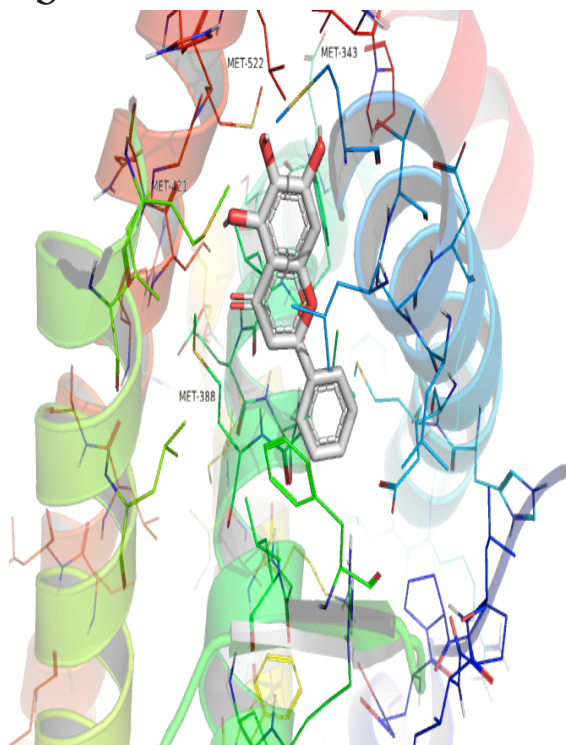**c**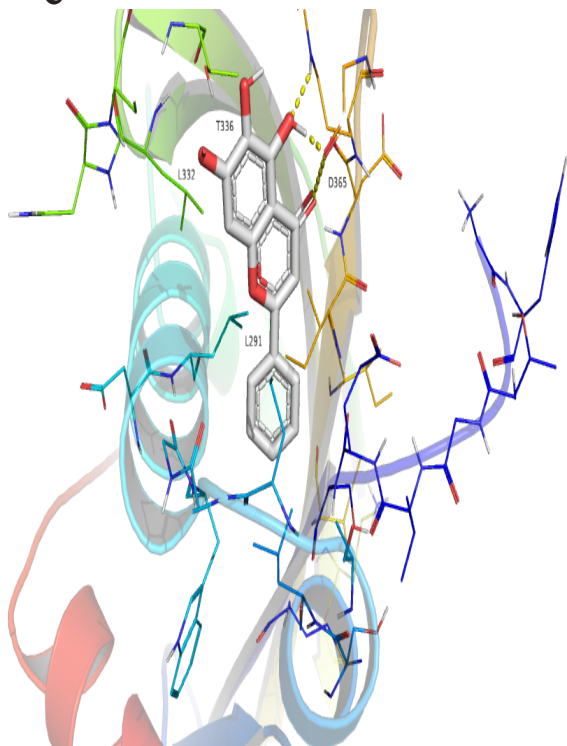**d**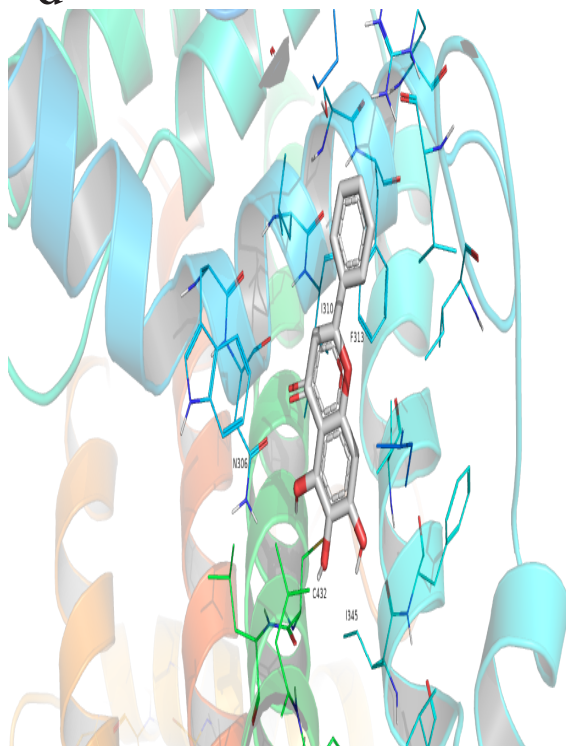

Supplement: mmc3.pdf [file mmc3.pdf]

**a**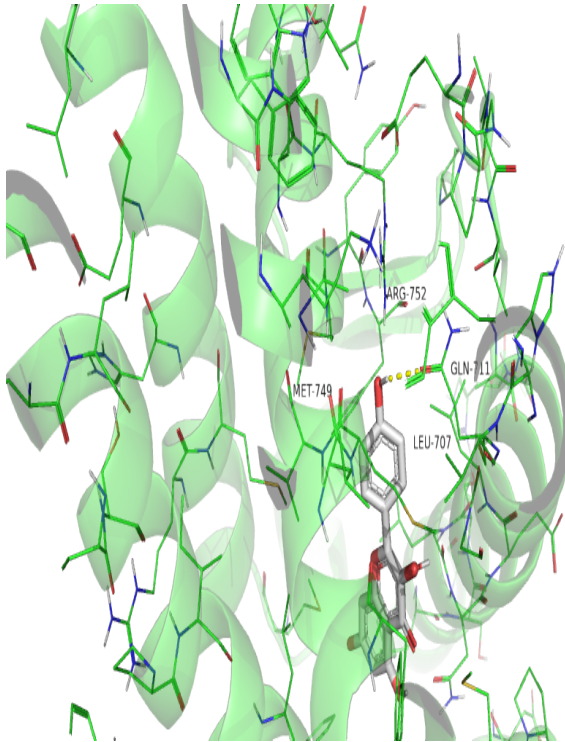**b**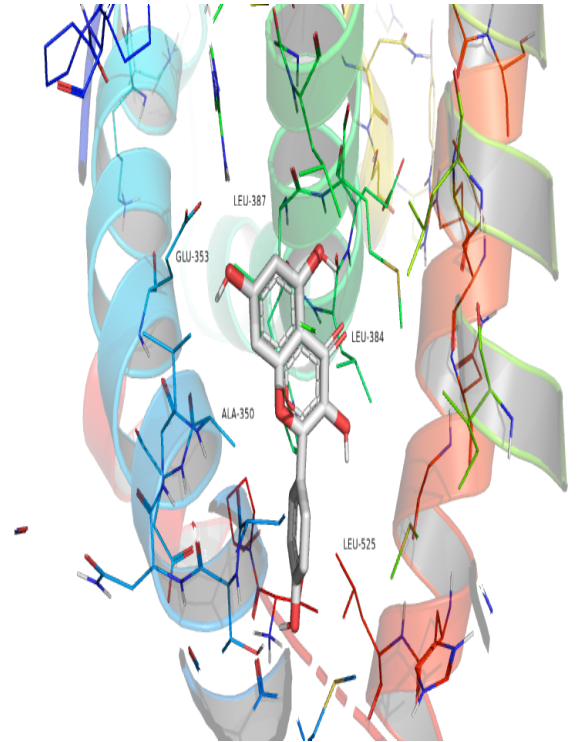**c**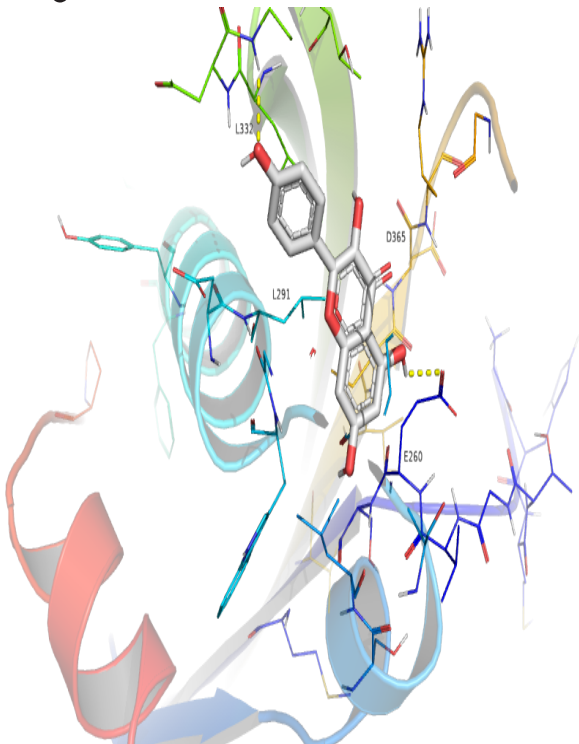**d**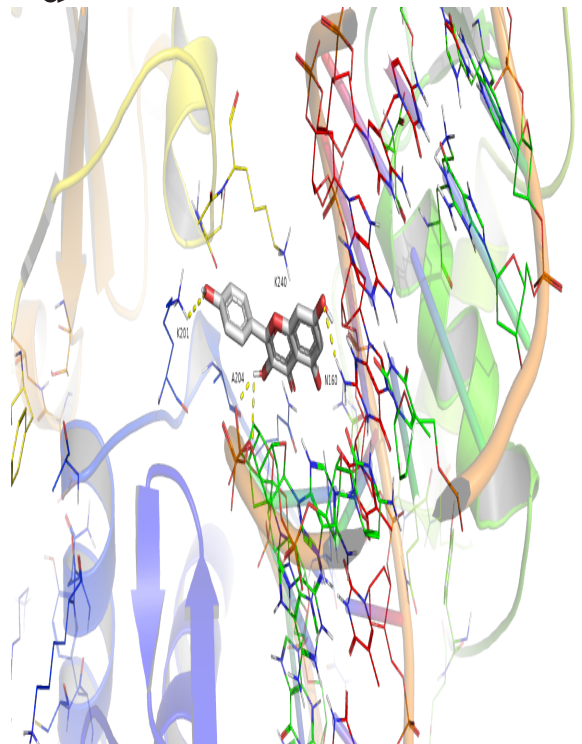

Supplement: mmc4.pdf [file mmc4.pdf]

**a**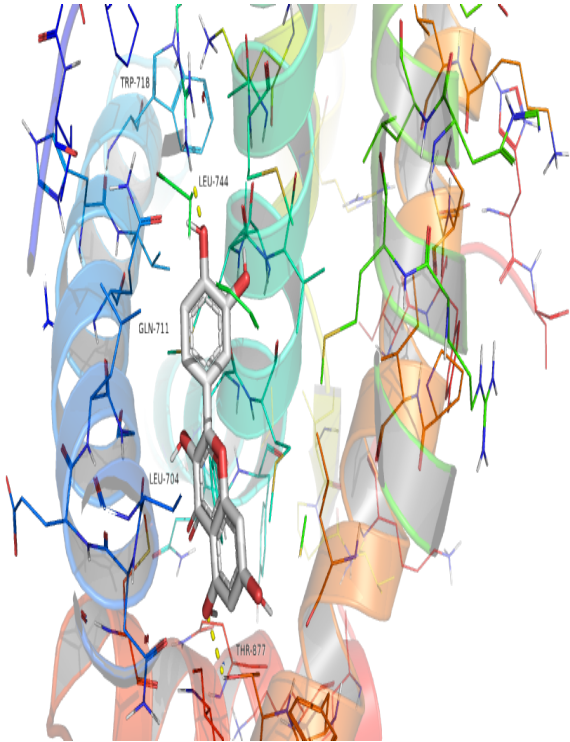**b**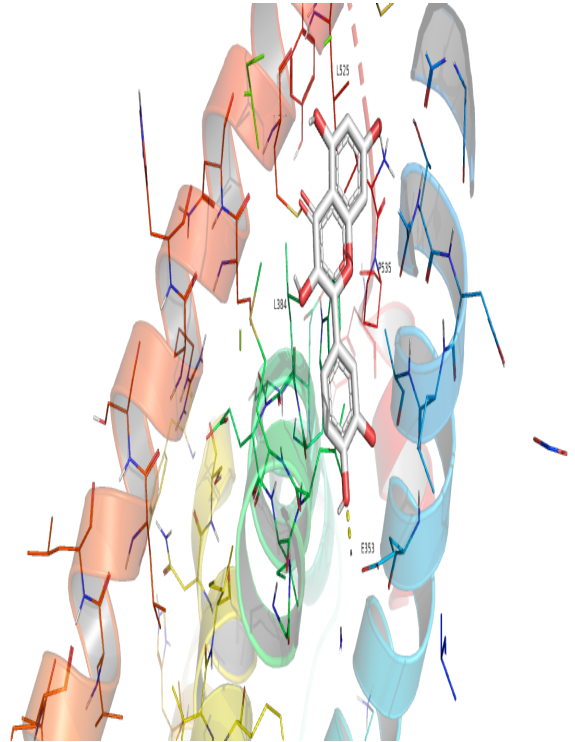**c**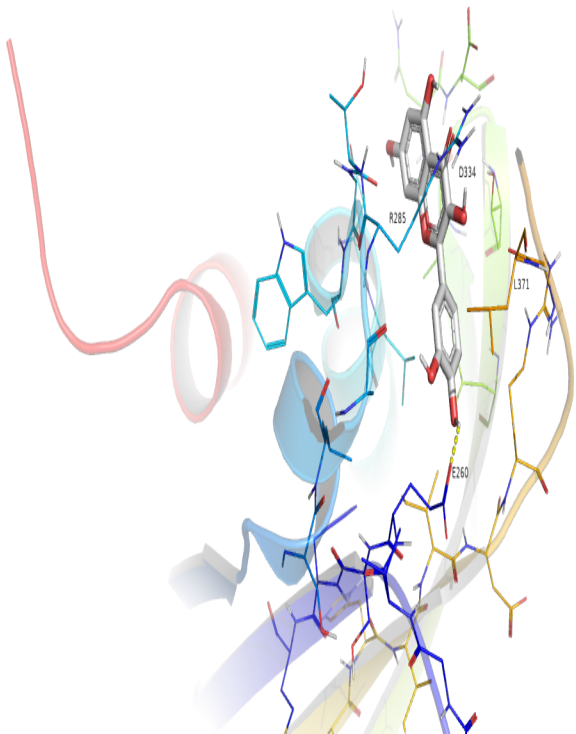**d**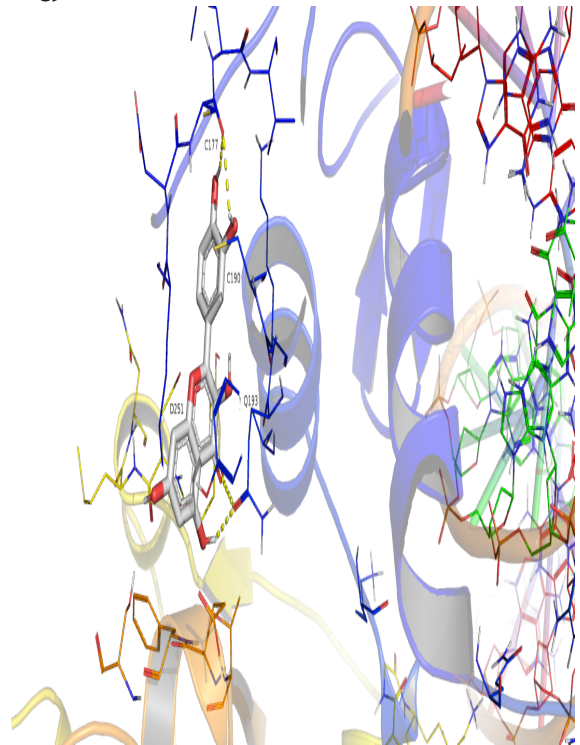

Supplement: mmc5.pdf [file mmc5.pdf]

**a**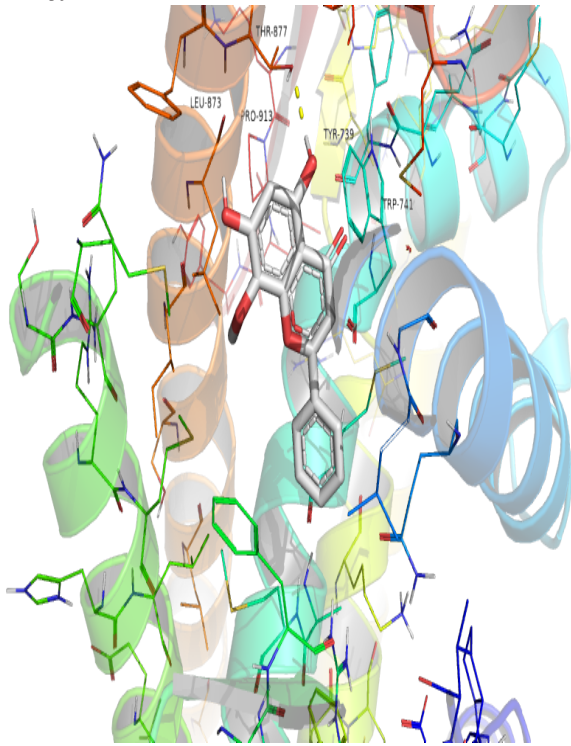**b**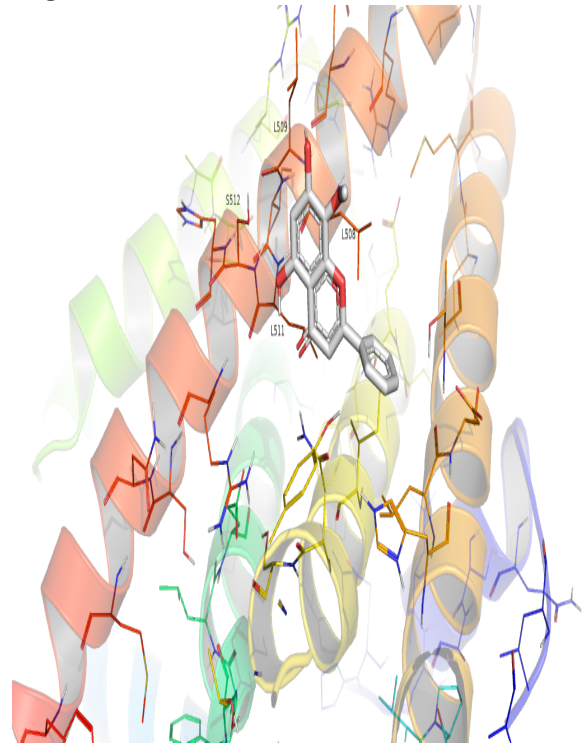**c**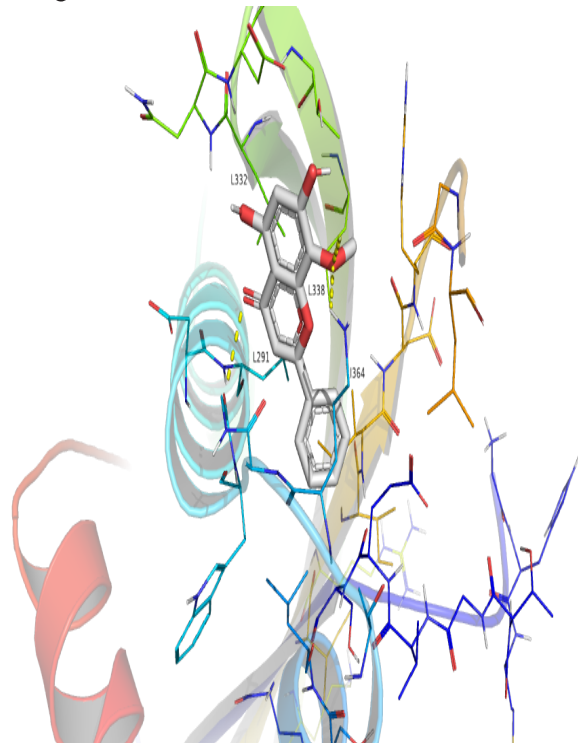**d**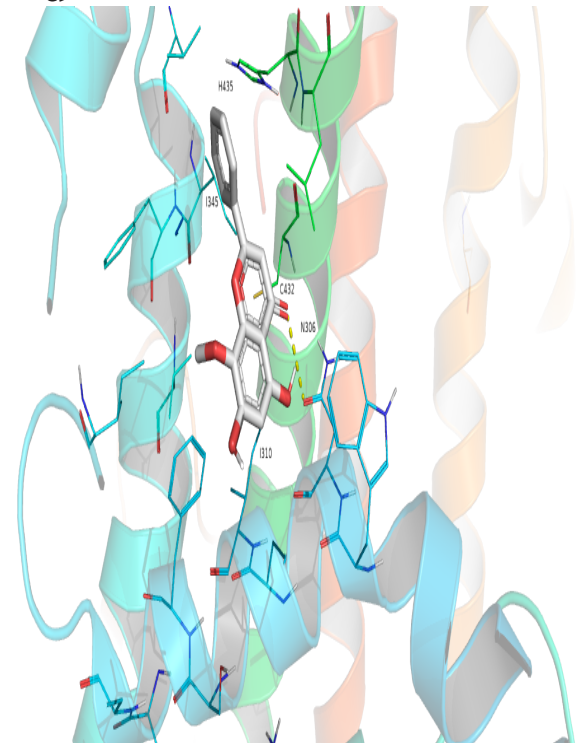

Supplement: mmc6.pdf [file mmc6.pdf]
